# Supplementary material for: Effectiveness of Advanced Oxidation Processes in Wastewater Treatment: State of the Art
Source: MDPI journal article supplement (doi:10.3390/w13152094), 2021-07-30
Supplement: s1 [file s1]

### Supplementary Material

**Table S1.** Removal percentage of pharmaceutical compounds using AOPs.

| Pharmaceutical      | Type       | AOP type                                      | Experimental conditions                                                                                                                                                        | Removal %                                                              | Observations                                                                                                                                                                             | Reference |
|---------------------|------------|-----------------------------------------------|--------------------------------------------------------------------------------------------------------------------------------------------------------------------------------|------------------------------------------------------------------------|------------------------------------------------------------------------------------------------------------------------------------------------------------------------------------------|-----------|
| Ciprofloxacin (CIP) | Antibiotic | O <sub>3</sub> -based AOPs                    | O <sub>3</sub> flow rate of 120 mL min <sup>-1</sup><br>[Cip] <sub>0</sub> = 7.5–45 mg L <sup>-1</sup><br>pH 3–10 (buffer)<br>T = 6–62 °C<br>[ <i>t</i> -BuOH] = 30 mM         | 95                                                                     | By HPLC-MS analysis, the desethylene ciprofloxacin was identified as one of the degradation products. A strong pH dependence of the formation of desethylene ciprofloxacin was observed. | [78]      |
| Ciprofloxacin       | Antibiotic | O <sub>3</sub> -based AOPs                    | Laboratory scale<br>[O <sub>3</sub> ] = 0.23 mM;<br>pH = 7.8–8.7<br>[C] <sub>0</sub> = 572 ng L <sup>-1</sup>                                                                  | 98<br>≈15 (TOC)                                                        | 18 filtered wastewaters were characterised: 10 domestic and 8 urban.<br>Subproducts: carboxylates and low molecular weight oxalates                                                      | [59]      |
|                     |            | O <sub>3</sub> /H <sub>2</sub> O <sub>2</sub> | Laboratory scale<br>[O <sub>3</sub> ] = 0.23 mM<br>[C] <sub>0</sub> = 741 ng L <sup>-1</sup><br>[H <sub>2</sub> O <sub>2</sub> ] = 20 mM, 0.15 mL (30% w/v) every 5 min in 5 L | >93<br>>90 (TOC)                                                       |                                                                                                                                                                                          |           |
| Ciprofloxacin       | Antibiotic | UV/H <sub>2</sub> O <sub>2</sub>              | LP-Hg lamp<br>[C] <sub>0</sub> = 5 µM<br>Toxicity assay with <i>vibrio fischeri</i> bacteria<br>Types of water: treated water, ultrapure, surface and wastewater               | Total or not detected in the effluent after 11 448 mJ cm <sup>-2</sup> | The treated water was more rapidly degraded. Toxicity increased and then decreased                                                                                                       | [58]      |
| Ciprofloxacin       | Antibiotic | UV/H <sub>2</sub> O <sub>2</sub>              | LP-Hg lamp<br>pH natural<br>T = 20 °C                                                                                                                                          | Total or not detected in the effluent (20 min)                         | Laboratory scale<br>Real wastewater                                                                                                                                                      | [57]      |

|               |            |                                                    |                                                                                                                                                                                                                                                                         |                                                                     |                                                                                                                                                        |      |
|---------------|------------|----------------------------------------------------|-------------------------------------------------------------------------------------------------------------------------------------------------------------------------------------------------------------------------------------------------------------------------|---------------------------------------------------------------------|--------------------------------------------------------------------------------------------------------------------------------------------------------|------|
|               |            |                                                    | $[C]_0 = 22,30 \mu\text{g L}^{-1}$<br>$[C]_0 = 17,7 \mu\text{g L}^{-1}$<br>$[C]_0 = 98,53 \mu\text{g L}^{-1}$<br>$[\text{H}_2\text{O}_2] = 25 \text{ mg L}^{-1}$<br>$[\text{H}_2\text{O}_2] = 50 \text{ mg L}^{-1}$<br>$[\text{H}_2\text{O}_2] = 100 \text{ mg L}^{-1}$ |                                                                     | For each ciprofloxacin concentration, three UV/H <sub>2</sub> O <sub>2</sub> tests with different H <sub>2</sub> O <sub>2</sub> concentrations         |      |
| Ciprofloxacin | Antibiotic | UV/H <sub>2</sub> O <sub>2</sub>                   | UV-C irradiation ( $\lambda = 254 \text{ nm}$ , 230 W)<br><br>$Q_{\text{UV}} = 0.9 \text{ kJ L}^{-1}$<br><br>$[\text{H}_2\text{O}_2] = 5 \text{ mg L}^{-1}$<br><br>80 L of CAS effluents spiked with CIP (100 $\mu\text{g L}^{-1}$ )<br><br>pH: inherent, 7.5–8.0       | >99% (90 min)                                                       | Pilot-scale setup                                                                                                                                      | [50] |
|               |            | Sunlight/H <sub>2</sub> O <sub>2</sub>             | Natural solar irradiation<br><br>$Q_{\text{UV}} = 8 \text{ kJ L}^{-1}$<br><br>$[\text{H}_2\text{O}_2] = 30 \text{ mg L}^{-1}$<br><br>60 L of CAS effluents spiked with CIP (100 $\mu\text{g L}^{-1}$ )<br><br>pH: inherent, 7.5–8.0                                     | >99% (60 min)                                                       |                                                                                                                                                        |      |
| Ciprofloxacin | Antibiotic | UV/H <sub>2</sub> O <sub>2</sub>                   | T = 20 °C<br>Monochromatic Pen-Ray Hg lamp (254 nm; 4750 $\mu\text{W cm}^{-2}$ )                                                                                                                                                                                        | Total or not detected in the effluent (90 min)<br>28 (TOC)          | Under mechanical stirring and temperature of 20°C, a constant current density of 50 mA cm <sup>-2</sup> was applied during the 90 min of electrolysis. | [79] |
|               |            | UV/H <sub>2</sub> O <sub>2</sub> /Fe <sup>2+</sup> | T = 20 °C<br>Monochromatic Pen-Ray Hg lamp (254 nm; 4750 $\mu\text{W cm}^{-2}$ )<br>0,10 mmol FeSO <sub>4</sub> ·7H <sub>2</sub> O                                                                                                                                      | Total or not detected in the effluent (90 min)<br>54,8 TOC (90 min) |                                                                                                                                                        |      |

|                  |                   |                                                    |                                                                                                                                                                                                                                                                                                                      |                                                                                                    |                                                                                                                                                  |      |
|------------------|-------------------|----------------------------------------------------|----------------------------------------------------------------------------------------------------------------------------------------------------------------------------------------------------------------------------------------------------------------------------------------------------------------------|----------------------------------------------------------------------------------------------------|--------------------------------------------------------------------------------------------------------------------------------------------------|------|
|                  |                   |                                                    |                                                                                                                                                                                                                                                                                                                      | 84,6 TOC (360 min)                                                                                 |                                                                                                                                                  |      |
| Amoxicillin      | Antibiotic        | UV/H <sub>2</sub> O <sub>2</sub>                   | Low pressure Hg arc-UV lamp<br>$I = 8 \times 10^{-7}$ Einstein L <sup>-1</sup> s <sup>-1</sup><br>$T = 20$ °C<br>[H <sub>2</sub> O <sub>2</sub> ] = 0.4–10 mM<br>Antibacterial activity was measured using <i>Escherichia coli</i> bacteria                                                                          | 99% (20 min)                                                                                       | Pseudo-first order kinetics<br>Low mineralization<br>UV/H <sub>2</sub> O <sub>2</sub> process effectively eliminated antibacterial activity      | [64] |
| Amoxicillin      | Antibiotic        | UV/TiO <sub>2</sub>                                | [C] <sub>0</sub> = 104, 105, and 103 mg L <sup>-1</sup> respectively<br>pH = 5                                                                                                                                                                                                                                       | 20%                                                                                                | Pseudo-first order kinetics<br>$k = 0.007, 0.003$ and $0.029$ min <sup>-1</sup> , respectively<br>At pH 11 was achieved the highest degradation. | [65] |
|                  |                   | UV/H <sub>2</sub> O <sub>2</sub> /TiO <sub>2</sub> | DOC = 8.4 mg L <sup>-1</sup><br>TiO <sub>2</sub> (Anatase > 99%)<br>UV(365 nm)                                                                                                                                                                                                                                       | ≈ Total or not detected in the effluent                                                            |                                                                                                                                                  |      |
| Clarithromycin   | Antibiotic        | O <sub>3</sub> -based AOPs                         | [C] <sub>0</sub> = $1 \times 10^4$ M<br>[O <sub>3</sub> ] ≈ 10 <sup>-5</sup> M<br>pH (phosphate buffer)<br>$k_{O_3} = 7 \times 10^4$ M <sup>-1</sup> s <sup>-1</sup> (pH 7)                                                                                                                                          | Total or not detected in the effluent                                                              | Ultrapure water<br>Subproduct determination<br>Toxicity test with <i>P. putida</i>                                                               | [80] |
| Diclofenac       | Anti-inflammatory | O <sub>3</sub> -based AOPs                         | [C] <sub>0</sub> = 26 µM (8 mg L <sup>-1</sup> )<br>Molar ratio: (O <sub>3</sub> : diclofenac) 10:1.<br>With and without <i>t</i> -BuOH;<br>[O <sub>3</sub> ] <sub>0</sub> minimum for 10 µg L <sup>-1</sup> of diclofenac = 0.016 mg L <sup>-1</sup><br>$k_{O_3} = 6.8 \times 10^5$ M <sup>-1</sup> s <sup>-1</sup> | Total or not detected in the effluent (complete degradation of potentially toxic primary products) | Laboratory scale<br>Subproducts: diclofenac-2,5-iminoquinone (32%), 5-hydroxydiclofenac (7%), 2,6-dichloroaniline (19%)                          | [74] |
| Diclofenac       | Anti-inflammatory | UV/H <sub>2</sub> O <sub>2</sub>                   | LP and MP lamp<br>UV doses ranged from 300–700 mJ cm <sup>-2</sup><br>[H <sub>2</sub> O <sub>2</sub> ] = 0–10 mg L <sup>-1</sup>                                                                                                                                                                                     | >80%                                                                                               | Removal was largely attributed to direct photodegradation                                                                                        | [61] |
| Sulfamethoxazole | Antibiotics       | O <sub>3</sub> -based AOPs                         | $T = 22$ °C<br>pH <sub>SMX</sub> = 4.63<br>[SMX] <sub>0</sub> = 30 mg L <sup>-1</sup>                                                                                                                                                                                                                                | 99,9                                                                                               | Ozone primarily reacts with SMX by attacking the aniline (p-sulfonylaniline) moiety                                                              | [63] |

|                  |                   |                                        |                                                                                                                                                                                                                                                 |                                                |                                                                                                       |      |
|------------------|-------------------|----------------------------------------|-------------------------------------------------------------------------------------------------------------------------------------------------------------------------------------------------------------------------------------------------|------------------------------------------------|-------------------------------------------------------------------------------------------------------|------|
| Sulfamethoxazole | Antibiotics       | UV/H <sub>2</sub> O <sub>2</sub>       | LP and MP lamp<br>UV doses ranged from 300–700 mJ cm <sup>-2</sup><br>[H <sub>2</sub> O <sub>2</sub> ] = 0–10 mg L <sup>-1</sup>                                                                                                                | >90%                                           | Removal was largely attributed to direct photodegradation                                             | [61] |
| Sulfamethoxazole | Antibiotics       | UV/H <sub>2</sub> O <sub>2</sub>       | LP-Hg lamp (10W, 254 nm)<br>pH= 3 – 8.<br>[SMX] <sub>0</sub> = 20 µM; [H <sub>2</sub> O <sub>2</sub> ] <sub>0</sub> = 1 mM;                                                                                                                     | Total or not detected in the effluent (60 min) | Filtrated waters from two drinking water plants using surface water and ground water as water sources | [62] |
| Sulfamethoxazole | Antibiotic        | UV/H <sub>2</sub> O <sub>2</sub>       | UV-C irradiation (λ = 254 nm, 230 W)<br><br>Q <sub>UV</sub> = 0.9 kJ L <sup>-1</sup><br>[H <sub>2</sub> O <sub>2</sub> ] = 5 mg L <sup>-1</sup><br><br>80 L of CAS effluents spiked with CIP (100 µg L <sup>-1</sup> )<br>pH: inherent, 7.5–8.0 | >99% (90 min)                                  | Pilot-scale setup                                                                                     | [50] |
|                  |                   | Sunlight/H <sub>2</sub> O <sub>2</sub> | Natural solar irradiation<br><br>Q <sub>UV</sub> = 42 kJ L <sup>-1</sup><br>[H <sub>2</sub> O <sub>2</sub> ] = 30 mg L <sup>-1</sup><br><br>60 L of CAS effluents spiked with CIP (100 µg L <sup>-1</sup> )<br>pH: inherent, 7.5–8.0            | ~46% (300 min)                                 |                                                                                                       |      |
| Sulfamethizole   | Antibiotic        | O <sub>3</sub> -based AOPs             | O <sub>3</sub> flow rate of 1.2 L min <sup>-1</sup><br>[O <sub>3</sub> ] <sub>0</sub> = 1–3.2 mg L <sup>-1</sup><br>[S] <sub>0</sub> = 1000 µg L <sup>-1</sup><br>[HCO <sub>3</sub> <sup>-</sup> ] = 2–20 mM<br>T = 22 °C<br>pH = 2–10          | 99,9                                           |                                                                                                       | [81] |
| Ibuprofen        | Anti-inflammatory | UV/H <sub>2</sub> O <sub>2</sub>       | pH natural<br>T = 20 °C<br>[C] <sub>0</sub> = 54.60 µg L <sup>-1</sup>                                                                                                                                                                          | 89,8 – 100 (40 min)                            | Laboratory scale<br>Real wastewater                                                                   | [57] |

|                   |                   |                                               |                                                                                                                                                                                                                                                                                                                    |                              |                                                                                                                                                                                       |      |
|-------------------|-------------------|-----------------------------------------------|--------------------------------------------------------------------------------------------------------------------------------------------------------------------------------------------------------------------------------------------------------------------------------------------------------------------|------------------------------|---------------------------------------------------------------------------------------------------------------------------------------------------------------------------------------|------|
|                   |                   |                                               | $[C]_0 = 69.60 \mu\text{g L}^{-1}$<br>$[C]_0 = 275.00 \mu\text{g L}^{-1}$<br>$[\text{H}_2\text{O}_2] = 25 \text{ mg L}^{-1}$<br>$[\text{H}_2\text{O}_2] = 50 \text{ mg L}^{-1}$<br>$[\text{H}_2\text{O}_2] = 100 \text{ mg L}^{-1}$                                                                                |                              | For each ibuprofen concentration, three UV/H <sub>2</sub> O <sub>2</sub> tests with different H <sub>2</sub> O <sub>2</sub> concentrations                                            |      |
| Naproxen          | Anti-inflammatory | O <sub>3</sub> -based AOPs                    | $[\text{O}_3] = 0.23 \text{ mM}$ ; pH = 7.8–8.7<br>$[C]_0 = 334 \text{ ng L}^{-1}$                                                                                                                                                                                                                                 | $>93$<br>$\approx 15$ (TOC)  | Laboratory scale<br>18 filtered wastewaters were characterised: 10 domestic and 8 urban.<br>Subproducts: carboxylates and low molecular weight oxalates                               | [59] |
|                   |                   | O <sub>3</sub> /H <sub>2</sub> O <sub>2</sub> | $[\text{O}_3] = 0.23 \text{ mM}$<br>$[C]_0 = 389 \text{ ng L}^{-1}$<br>$[\text{H}_2\text{O}_2] = 20 \text{ mM}$ , 0.15 mL (30% w/v) every 5 min in 5 L                                                                                                                                                             | $>94$<br>$>90$ (TOC)         |                                                                                                                                                                                       |      |
| Carbamazepine     | Antiepileptic     | UV/H <sub>2</sub> O <sub>2</sub>              | LP-Hg lamp (83 W, 1,04 W/cm <sup>2</sup> , 254 nm)<br>$[C]_0 = 5 \text{ mg/L}$<br>$[\text{H}_2\text{O}_2] = 0,2 \text{ g/L}$                                                                                                                                                                                       | 95 (30 min)<br>99,7 (60 min) | Laboratory scale                                                                                                                                                                      | [69] |
| Carbamazepine     | Antiepileptic     | UV/H <sub>2</sub> O <sub>2</sub>              | LP-Hg lamp<br>pH natural<br>T = 20 °C<br>$[C]_0 = 59,83 \mu\text{g L}^{-1}$<br>$[C]_0 = 95,03 \mu\text{g L}^{-1}$<br>$[C]_0 = 281,00 \mu\text{g L}^{-1}$<br>$[\text{H}_2\text{O}_2] = 25 \text{ mg L}^{-1}$<br>$[\text{H}_2\text{O}_2] = 50 \text{ mg L}^{-1}$<br>$[\text{H}_2\text{O}_2] = 100 \text{ mg L}^{-1}$ | 80,1 – 100 (40 min)          | Laboratory scale<br>Real wastewater<br>For each carbamazepine concentration, three UV/H <sub>2</sub> O <sub>2</sub> tests with different H <sub>2</sub> O <sub>2</sub> concentrations | [57] |
| Carbamazepine     | Antiepileptic     | UV/H <sub>2</sub> O <sub>2</sub>              | LP and MP lamp<br>UV doses ranged from 300–700 mJ cm <sup>-2</sup><br>$[\text{H}_2\text{O}_2] = 0\text{--}10 \text{ mg L}^{-1}$                                                                                                                                                                                    | <5%                          | was not appreciably removed with UV/H <sub>2</sub> O <sub>2</sub> treatment                                                                                                           | [61] |
| Chlortetracycline | Antibiotic        | O <sub>3</sub> -based AOPs                    | $[\text{CTCN}]_0 = 30 \text{ mg L}^{-1}$<br>pH <sub>CTCN</sub> = 4.33<br>T = 22 °C                                                                                                                                                                                                                                 | 99,9                         |                                                                                                                                                                                       | [63] |
| Lincomycin        | Antibiotic        | UV/H <sub>2</sub> O <sub>2</sub>              | $[C]_0 = 0.03 \text{ mM}$<br>LP lamp (254 nm)<br>$[t\text{-BuOH}] = 10 \text{ mM}$                                                                                                                                                                                                                                 | $\approx 80$<br>(in 3 min)   | No toxic product generation                                                                                                                                                           | [68] |

|               |            |                                                 |                                                                                                                                                                                                                                                                                                                                                                                                     |                                                                                          |                                                                            |      |
|---------------|------------|-------------------------------------------------|-----------------------------------------------------------------------------------------------------------------------------------------------------------------------------------------------------------------------------------------------------------------------------------------------------------------------------------------------------------------------------------------------------|------------------------------------------------------------------------------------------|----------------------------------------------------------------------------|------|
|               |            |                                                 | $k_{OH} = 4.37 \times 10^9 \text{ M}^{-1} \text{ s}^{-1}$ (pH 5.5)<br>$k_{OH} = 4.59 \times 10^9 \text{ M}^{-1} \text{ s}^{-1}$ (pH 7.5)                                                                                                                                                                                                                                                            |                                                                                          |                                                                            |      |
|               |            | O <sub>3</sub> -based AOPs                      | $[C]_0 = 0.5 \text{ mM}$<br>$[O_3]_0 = 0.4 \text{ mM}$<br>pH = 5.5–7.5<br>$[t\text{-BuOH}] = 10 \text{ mM}$<br>$k_{O_3} = 1.53 \times 10^5 \text{ M}^{-1} \text{ s}^{-1}$ (pH 3)<br>$k_{O_3} = 4.93 \times 10^5 \text{ M}^{-1} \text{ s}^{-1}$ (pH 6.7)<br>$k_{OH} = 4.37 \times 10^9 \text{ M}^{-1} \text{ s}^{-1}$ (pH 5.5)<br>$k_{OH} = 4.59 \times 10^9 \text{ M}^{-1} \text{ s}^{-1}$ (pH 7.5) | Total or not<br>detected in the<br>effluent (in<br>2 min)<br><br><10 (TOC in<br>180 min) | without toxicity in 1 h and<br>regardless of pH                            |      |
| Levofloxacin  | Antibiotic | O <sub>3</sub> -based AOPs                      | $[O_3]_0 = 2500 \text{ ppm}_v$<br>$[L]_0 = 16.4 \text{ mg L}^{-1}$<br>$T = 27.5 \text{ }^\circ\text{C}$<br>pH 3–7 (Buffer)<br>$[t\text{-BuOH}] = 30 \text{ mM}$<br>$[H_2O_2] = 2\text{--}100 \text{ }\mu\text{M}$                                                                                                                                                                                   | 99,9                                                                                     | Degradation was about 2 times<br>faster at pH 10 compared to pH<br>3 and 7 | [60] |
| Metronidazole | Antibiotic | UV/H <sub>2</sub> O <sub>2</sub>                | $[C]_0 = 6.0 \text{ }\mu\text{M}$ (1 mg L <sup>-1</sup> )<br>pH 6.0<br>LP lamp 254 nm (1.5 mW cm <sup>-2</sup> );<br>$[H_2O_2] = 25 \text{ mg L}^{-1}$                                                                                                                                                                                                                                              | 59                                                                                       | Degradation exhibited pseudo-<br>first order reaction kinetics             | [67] |
|               |            |                                                 | $[C]_0 = 6.0 \text{ }\mu\text{M}$ (1 mg L <sup>-1</sup> )<br>pH 6.0<br>LP lamp 254 nm (1.5 mW cm <sup>-2</sup> );<br>$[H_2O_2] = 50 \text{ mg L}^{-1}$                                                                                                                                                                                                                                              | 67                                                                                       |                                                                            |      |
|               |            |                                                 | $[C]_0 = 6.0 \text{ }\mu\text{M}$ (1 mg L <sup>-1</sup> )<br>pH 6.0<br>MP lamp 200–400 nm (1.9 mW cm <sup>-2</sup> )<br>$[H_2O_2] = 25 \text{ mg L}^{-1}$                                                                                                                                                                                                                                           | 58                                                                                       |                                                                            |      |
|               |            |                                                 | $[C]_0 = 6.0 \text{ }\mu\text{M}$ (1 mg L <sup>-1</sup> )<br>pH 6.0<br>MP lamp 200–400 nm (1.9 mW cm <sup>-2</sup> )<br>$[H_2O_2] = 50 \text{ mg L}^{-1}$                                                                                                                                                                                                                                           | 64                                                                                       |                                                                            |      |
| Metronidazole | Antibiotic | H <sub>2</sub> O <sub>2</sub> /Fe <sup>2+</sup> | $[C]_0 = 6.0 \text{ }\mu\text{M}$ (1 mg L <sup>-1</sup> )<br>$[Fe^{2+}] = 2,94 \text{ }\mu\text{M}$                                                                                                                                                                                                                                                                                                 | 53                                                                                       | The degradation kinetics<br>followed a second order                        | [67] |

|               |                   |                                                    |                                                                                                                                                               |                 |                                                                                                                                                         |      |
|---------------|-------------------|----------------------------------------------------|---------------------------------------------------------------------------------------------------------------------------------------------------------------|-----------------|---------------------------------------------------------------------------------------------------------------------------------------------------------|------|
|               |                   |                                                    | [H <sub>2</sub> O <sub>2</sub> ] = 29,4 µM<br>pH 3.5                                                                                                          |                 | Adding more ferrous ions enhanced the oxidation rate                                                                                                    |      |
|               |                   |                                                    | [C] <sub>0</sub> = 6.0 µM (1 mg L <sup>-1</sup> )<br>[Fe <sup>2+</sup> ] = 5,88 µM<br>[H <sub>2</sub> O <sub>2</sub> ] = 29,4 µM<br>pH 3.5                    | 73              |                                                                                                                                                         |      |
|               |                   |                                                    | [C] <sub>0</sub> = 6.0 µM (1 mg L <sup>-1</sup> )<br>[Fe <sup>2+</sup> ] = 11,76 µM<br>[H <sub>2</sub> O <sub>2</sub> ] = 29,4 µM<br>pH 3.5                   | 76              |                                                                                                                                                         |      |
|               |                   | UV/H <sub>2</sub> O <sub>2</sub> /Fe <sup>2+</sup> | [C] <sub>0</sub> = 6.0 µM (1 mg L <sup>-1</sup> )<br>[Fe <sup>2+</sup> ] = 2,94 µM<br>[H <sub>2</sub> O <sub>2</sub> ] = 29,4 µM<br>pH 3.5                    | 74              |                                                                                                                                                         |      |
|               |                   |                                                    | [C] <sub>0</sub> = 6.0 µM (1 mg L <sup>-1</sup> )<br>[Fe <sup>2+</sup> ] = 5,88 µM<br>[H <sub>2</sub> O <sub>2</sub> ] = 29,4 µM<br>pH 3.5                    | 91              |                                                                                                                                                         |      |
|               |                   |                                                    | [C] <sub>0</sub> = 6.0 µM (1 mg L <sup>-1</sup> )<br>[Fe <sup>2+</sup> ] = 11,76 µM<br>[H <sub>2</sub> O <sub>2</sub> ] = 29,4 µM<br>pH 3.5                   | 94              |                                                                                                                                                         |      |
| Metronidazole | Antibiotic        | O <sub>3</sub> -based AOPs                         | [O <sub>3</sub> ] = 0.23 mM;<br>pH = 7.8–8.7<br>[C] <sub>0</sub> = 188 ng L <sup>-1</sup>                                                                     | 91<br>≈15 (TOC) | Laboratory scale<br>18 filtered wastewaters were characterised: 10 domestic and 8 urban.<br>Subproducts: carboxylates and low molecular weight oxalates | [59] |
|               |                   | O <sub>3</sub> /H <sub>2</sub> O <sub>2</sub>      | [O <sub>3</sub> ] = 0.23 mM<br>[C] <sub>0</sub> = 212 ng L <sup>-1</sup><br>[H <sub>2</sub> O <sub>2</sub> ] = 20 mM, 0.15 mL (30% w/v)<br>every 5 min in 5 L | 92<br>>90 (TOC) |                                                                                                                                                         |      |
| Ketoprofen    | Anti-inflammatory | O <sub>3</sub> -based AOPs                         | [O <sub>3</sub> ] = 0.23 mM;<br>pH = 7.8–8.7<br>[C] <sub>0</sub> = 335 ng L <sup>-1</sup>                                                                     | 69<br>≈15 (TOC) | Laboratory scale<br>18 filtered wastewaters were characterised: 10 domestic and 8 urban.                                                                | [59] |
|               |                   | O <sub>3</sub> /H <sub>2</sub> O <sub>2</sub>      | [O <sub>3</sub> ] = 0.23 mM<br>[C] <sub>0</sub> = 346 ng L <sup>-1</sup>                                                                                      | 70<br>>90 (TOC) |                                                                                                                                                         |      |

|                                                   |                                       |                                               |                                                                                                                                                                                                                           |                                                                        |                                                                                                                                                         |      |
|---------------------------------------------------|---------------------------------------|-----------------------------------------------|---------------------------------------------------------------------------------------------------------------------------------------------------------------------------------------------------------------------------|------------------------------------------------------------------------|---------------------------------------------------------------------------------------------------------------------------------------------------------|------|
|                                                   |                                       |                                               | [H <sub>2</sub> O <sub>2</sub> ] = 20 mM, 0.15 mL (30% w/v) every 5 min in 5L                                                                                                                                             |                                                                        | Subproducts: carboxylates and low molecular weight oxalates                                                                                             |      |
| Oxytetracycline                                   | Antibiotic                            | UV/H <sub>2</sub> O <sub>2</sub>              | LP-Hg lamp<br>[C] <sub>0</sub> = 5 µM<br>Toxicity assay with <i>vibrio fischeri</i> bacteria<br>Types of water: ultrapure, treated water, surface and wastewater                                                          | Total or not detected in the effluent after 11 448 mJ cm <sup>-2</sup> | The treated water was more rapidly degraded. Toxicity increased and then decreased                                                                      | [58] |
| Doxycycline                                       | Antibiotic                            | UV/H <sub>2</sub> O <sub>2</sub>              | LP-Hg lamp<br>[C] <sub>0</sub> = 5 µM<br>Toxicity assay with <i>vibrio fischeri</i> bacteria<br>Types of water: ultrapure, treated water, surface and wastewater                                                          | Total or not detected in the effluent after 11 448 mJ cm <sup>-2</sup> | The treated water was more rapidly degraded. Toxicity increased and then decreased                                                                      | [58] |
| Gemfibrozil                                       | Lipid-lowering drug, lipid regulator  | O <sub>3</sub> -based AOPs                    | [O <sub>3</sub> ] = 0.23 mM;<br>pH = 7.8–8.7<br>[C] <sub>0</sub> = 618 ng L <sup>-1</sup>                                                                                                                                 | >99<br>≈15 (TOC)                                                       | Laboratory scale<br>18 filtered wastewaters were characterised: 10 domestic and 8 urban.<br>Subproducts: carboxylates and low molecular weight oxalates | [59] |
|                                                   |                                       | O <sub>3</sub> /H <sub>2</sub> O <sub>2</sub> | [O <sub>3</sub> ] = 0.23 mM<br>[C] <sub>0</sub> = 608 ng L <sup>-1</sup><br>[H <sub>2</sub> O <sub>2</sub> ] = 20 mM, 0.15 mL (30% w/v) every 5 min in 5L                                                                 | >99<br>>90 (TOC)                                                       |                                                                                                                                                         |      |
| Bezafibrate                                       | Lipid-lowering drugs, lipid regulator | O <sub>3</sub> -based AOPs                    | [O <sub>3</sub> ] = 0.23 mM; pH 7.8–8.7<br>[C] <sub>0</sub> = 126 ng L <sup>-1</sup>                                                                                                                                      | ≈94<br>≈15 (TOC)                                                       | Laboratory scale<br>18 filtered wastewaters were characterised: 10 domestic and 8 urban.<br>Subproducts: carboxylates and low molecular weight oxalates | [59] |
| Sulfadiazine,<br>Sulfamethizole,<br>Sulfathiazole | Antibiotic                            | O <sub>3</sub> -based AOPs                    | O <sub>3</sub> flow rate of 1.2 L min <sup>-1</sup><br>[O <sub>3</sub> ] <sub>0</sub> = 1–3.2 mg L <sup>-1</sup><br>[S] <sub>0</sub> = 1000 µg L <sup>-1</sup><br>[HCO <sub>3</sub> <sup>-</sup> ] = 2–20 mM<br>T = 22 °C | 99,9                                                                   | It exhibited moderate reactivity to ozone                                                                                                               | [81] |



|                |                            |                            |                                                                                                                                           |                                           |                                                                                                                                                                       |      |
|----------------|----------------------------|----------------------------|-------------------------------------------------------------------------------------------------------------------------------------------|-------------------------------------------|-----------------------------------------------------------------------------------------------------------------------------------------------------------------------|------|
|                |                            |                            | pH = 2–10<br>$k_{O_3} > 2 \times 10^4 \text{ M}^{-1} \text{ s}^{-1}$ at pH of 2                                                           |                                           |                                                                                                                                                                       |      |
| Mefenamic acid | Anti<br>inflammatori<br>es | O <sub>3</sub> -based AOPs | [MEF] <sub>0</sub> = 0.54 mg L <sup>-1</sup><br>pH = 4–9 (buffer)<br>T = 25 °C<br>[O <sub>3</sub> ] <sub>0</sub> = 0.7 mg L <sup>-1</sup> | pH 4 = 37.5<br>pH 7 = 42.5<br>pH 9 = 45.8 | Degradation occurred during<br>the first 5 min of treatment<br>The degree of mineralization<br>was limited: at pH 9 only 25% of<br>Mefenamic acid was<br>mineralized. | [82] |
